# Supplementary material
Source: PubMed Central journal article supplement (PMC9243862)

---

**Supplementary information**

---

**Enteric viruses replicate in salivary glands  
and infect through saliva**

---

In the format provided by the  
authors and unedited

# Immunoblots for Saliva MNV-1 and EDIM

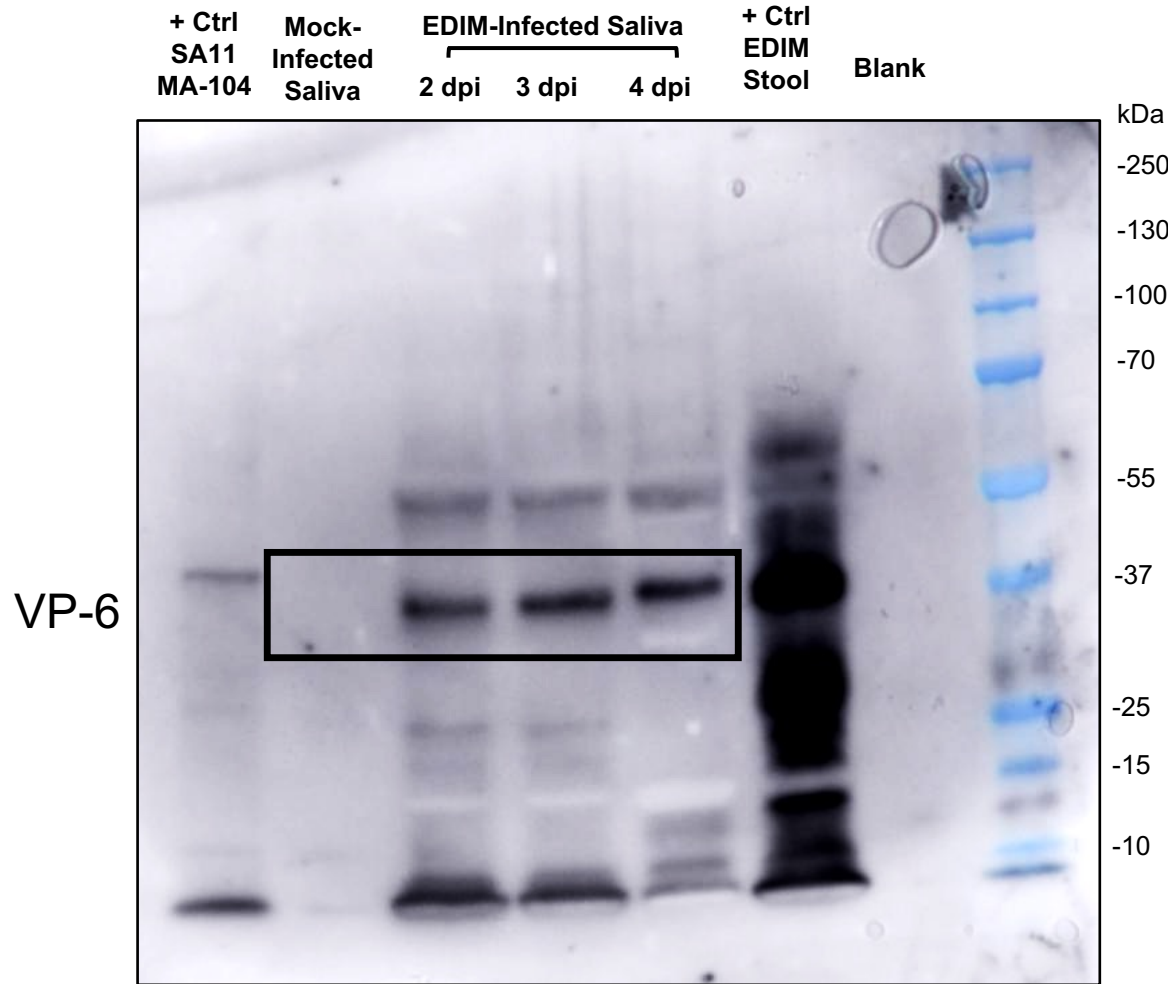

Fig. 2b

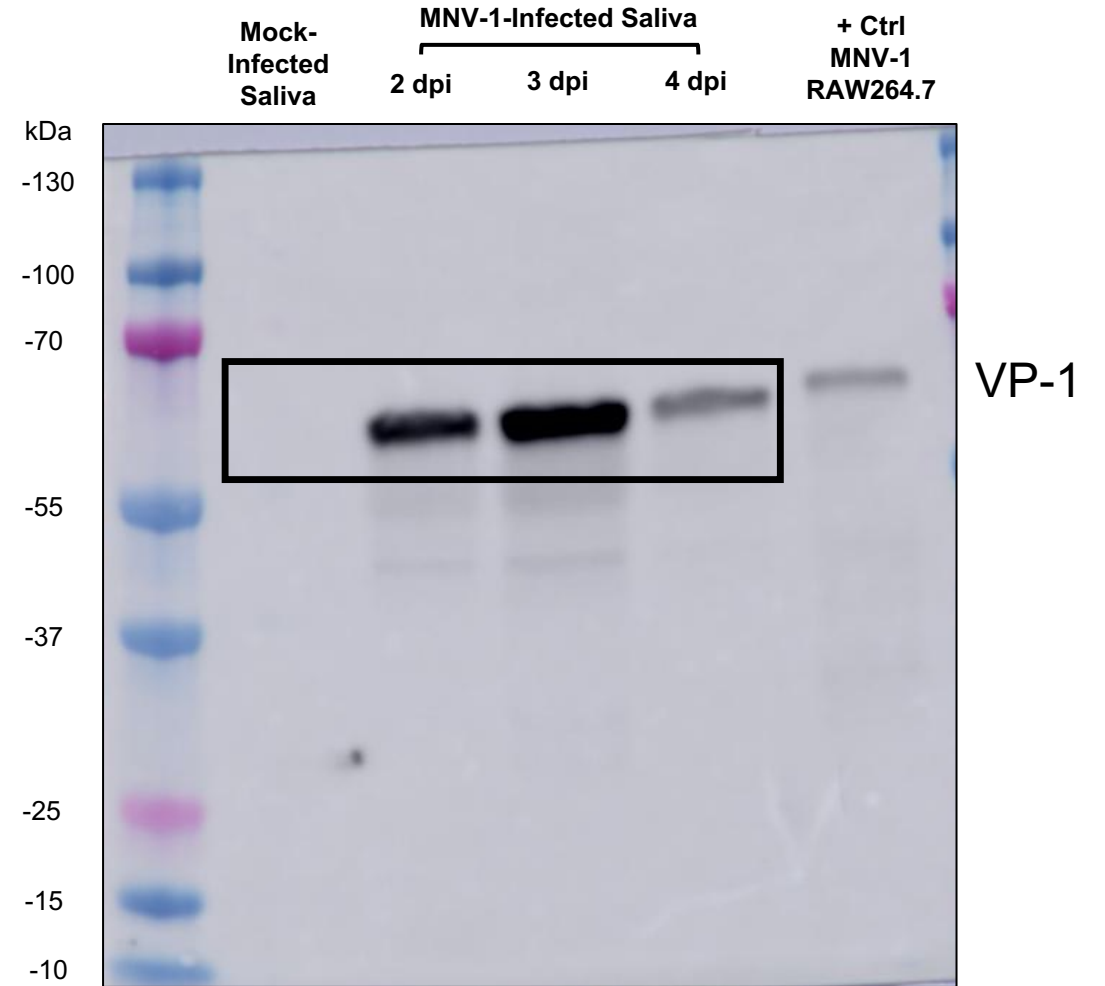

Fig. 2c

 Cropped frame used in figure

# Immunoblots for Salisphere MNV-1 and CR6 Replication

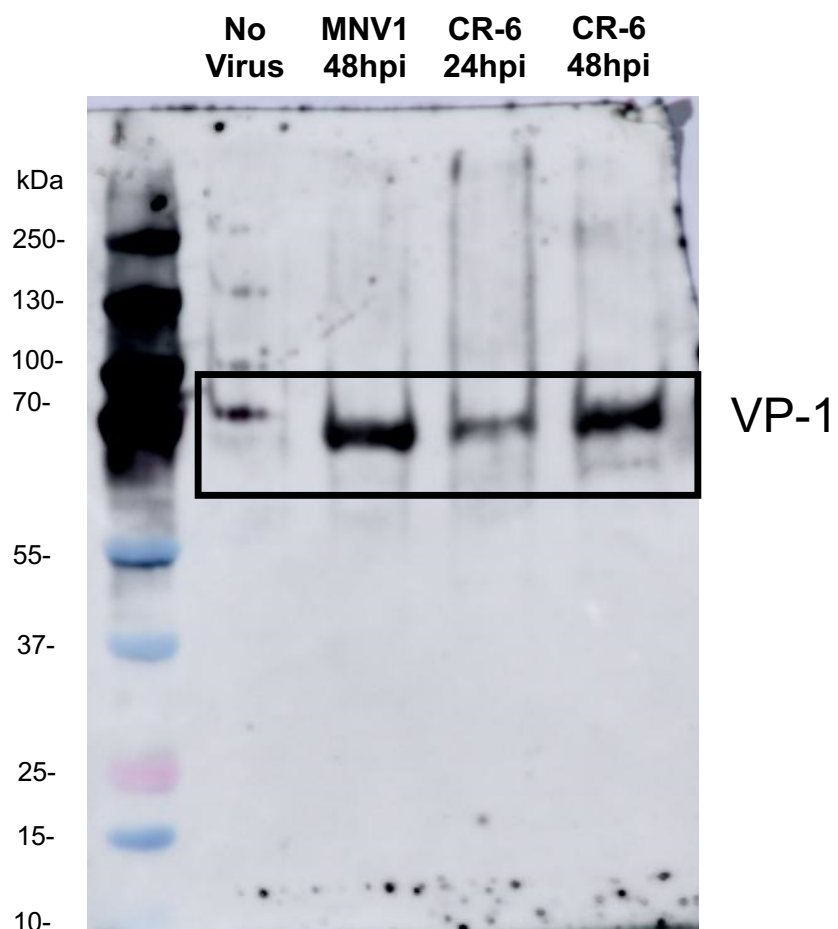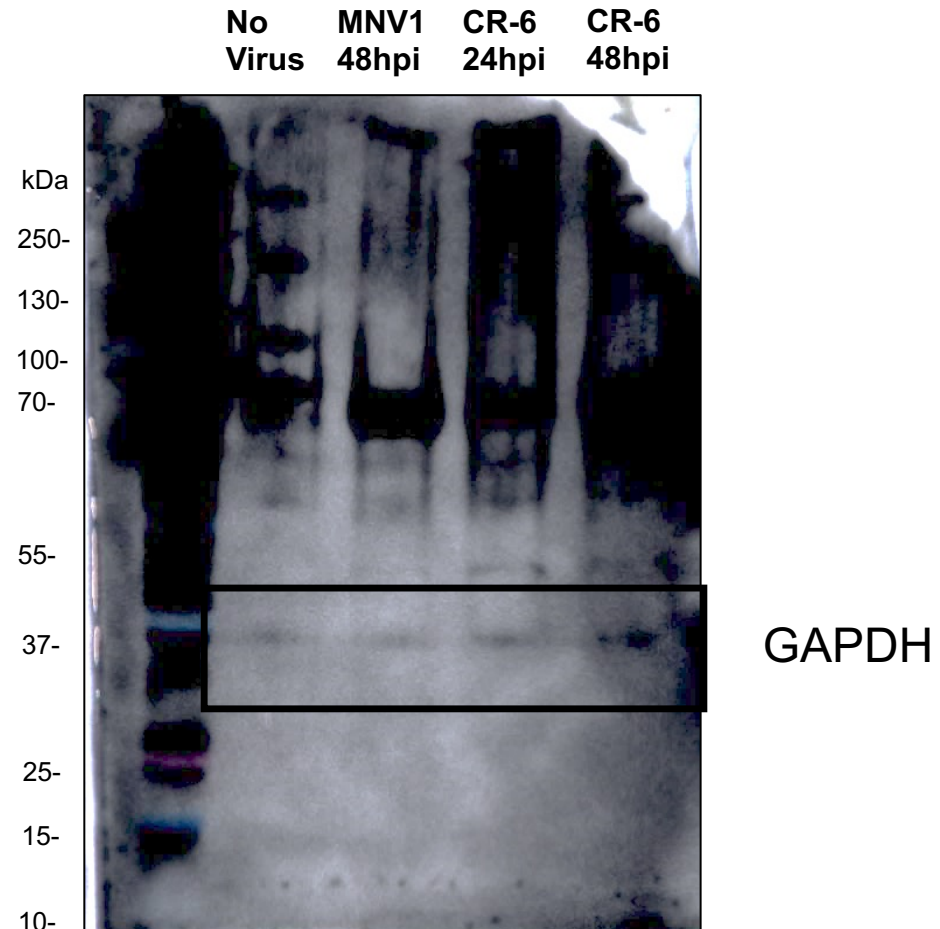

**Extended Data Fig. 4e**

 Cropped frame used in figure

# Immunoblots for NS-SV-TT-DC infection by Stool Filtrate

## GII.4-77.1 Stool Filtrate

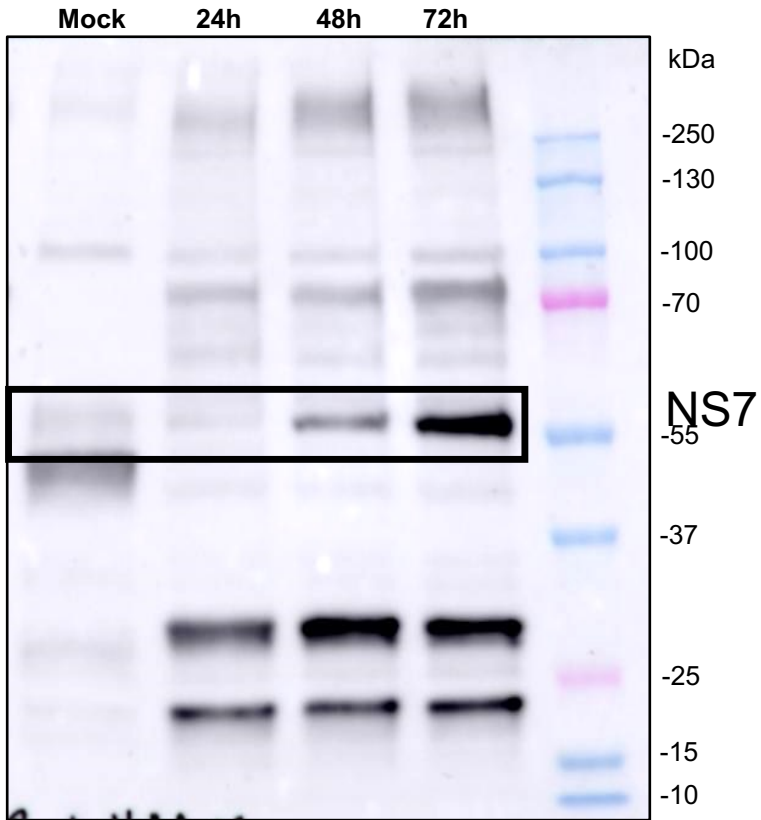

Fig. 4f

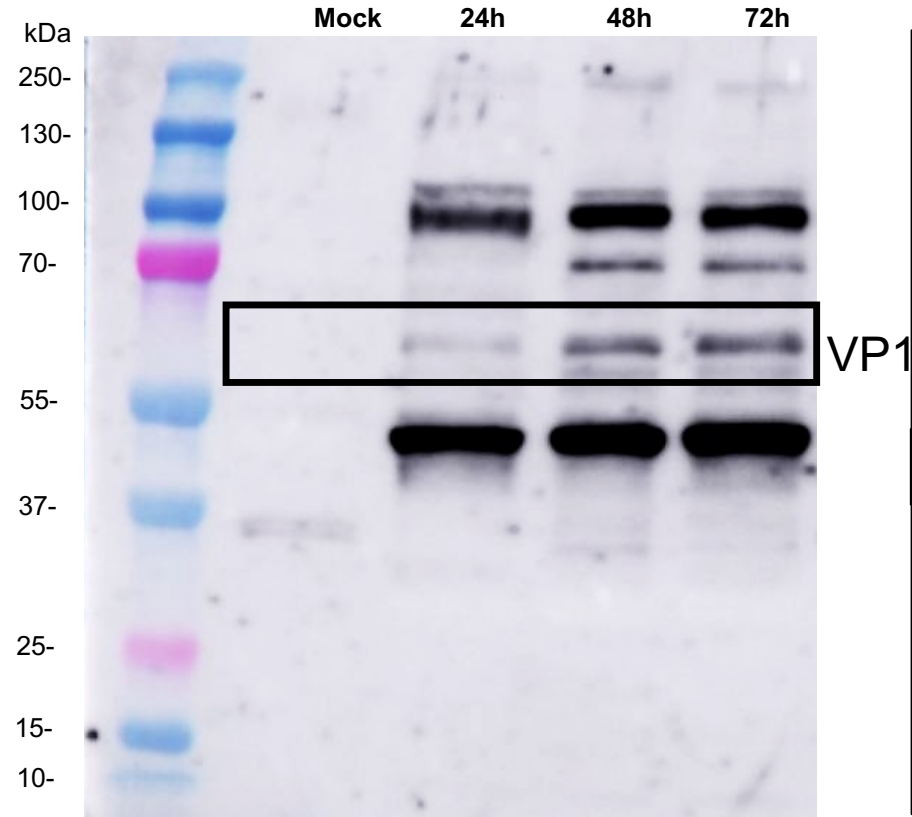

Fig. 4f

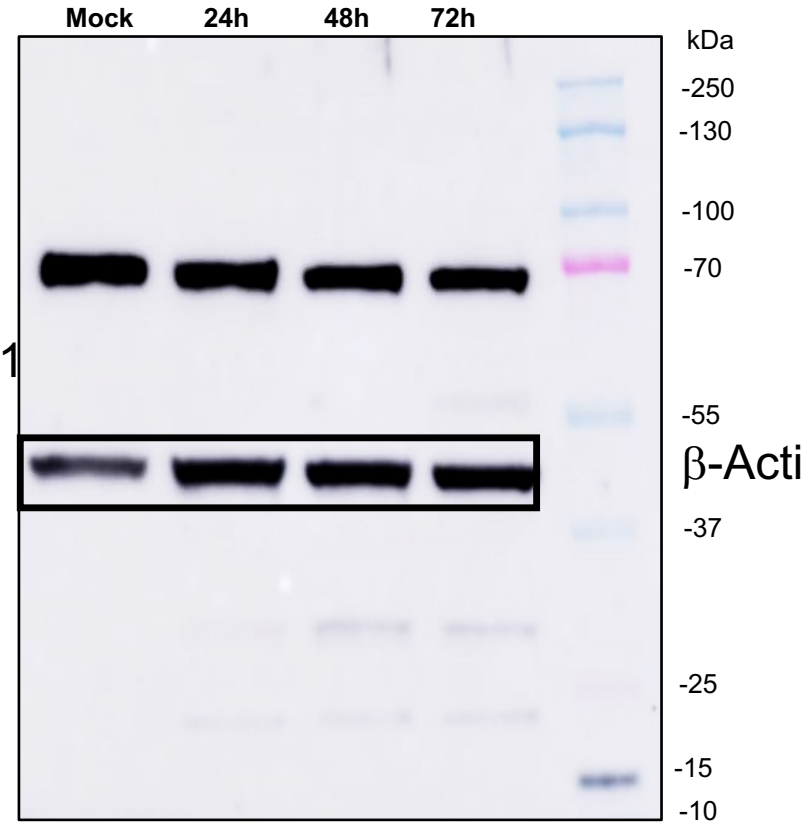

Fig. 4f

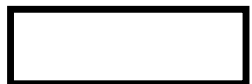

Cropped frame used in figure

# Immunoblots for NS-SV-TT-DC/AC HuNoV replication

## NS-SV-TT-DC

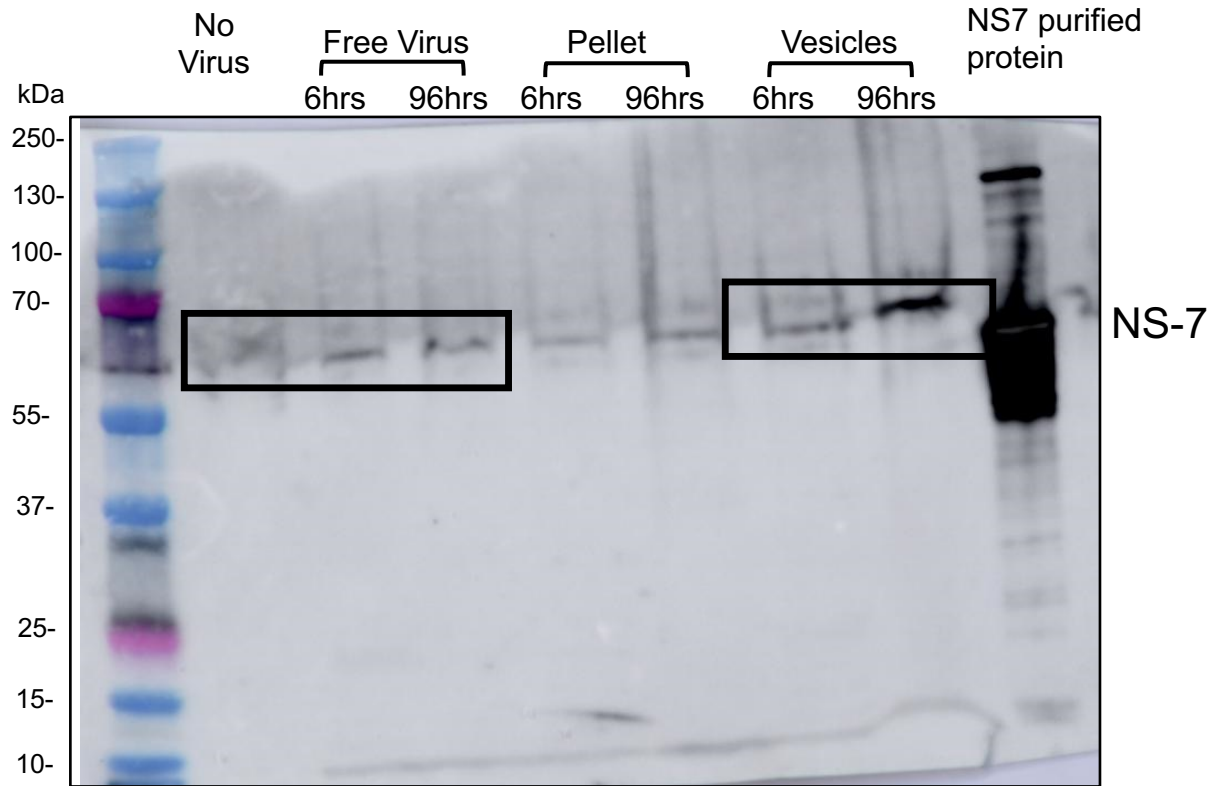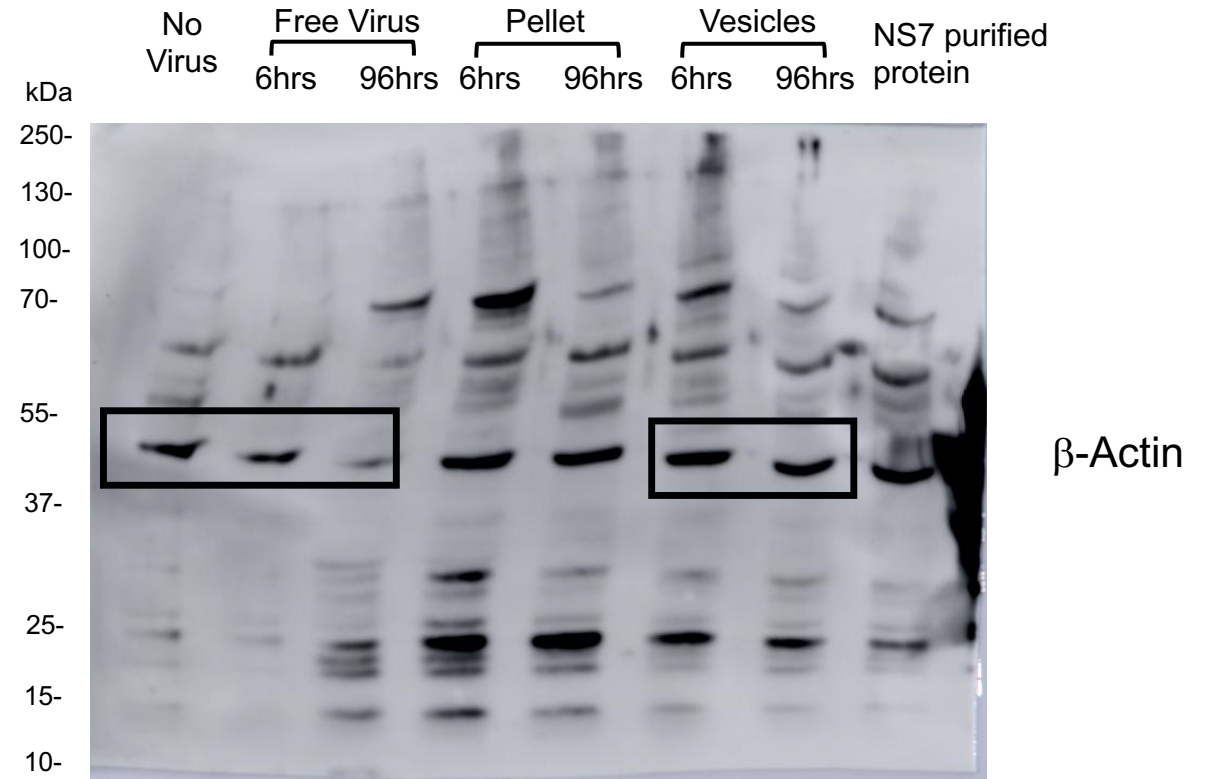

**Fig. 4k**

\*pellet= stool filtrate debris obtained after multiple rounds of spin-downs as mentioned in Methods. The supernatant from there was used for vesicle isolation.

 Cropped frame used in figure

# Immunoblots for NS-SV-TT-DC/AC HuNoV replication

## NS-SV-TT-AC

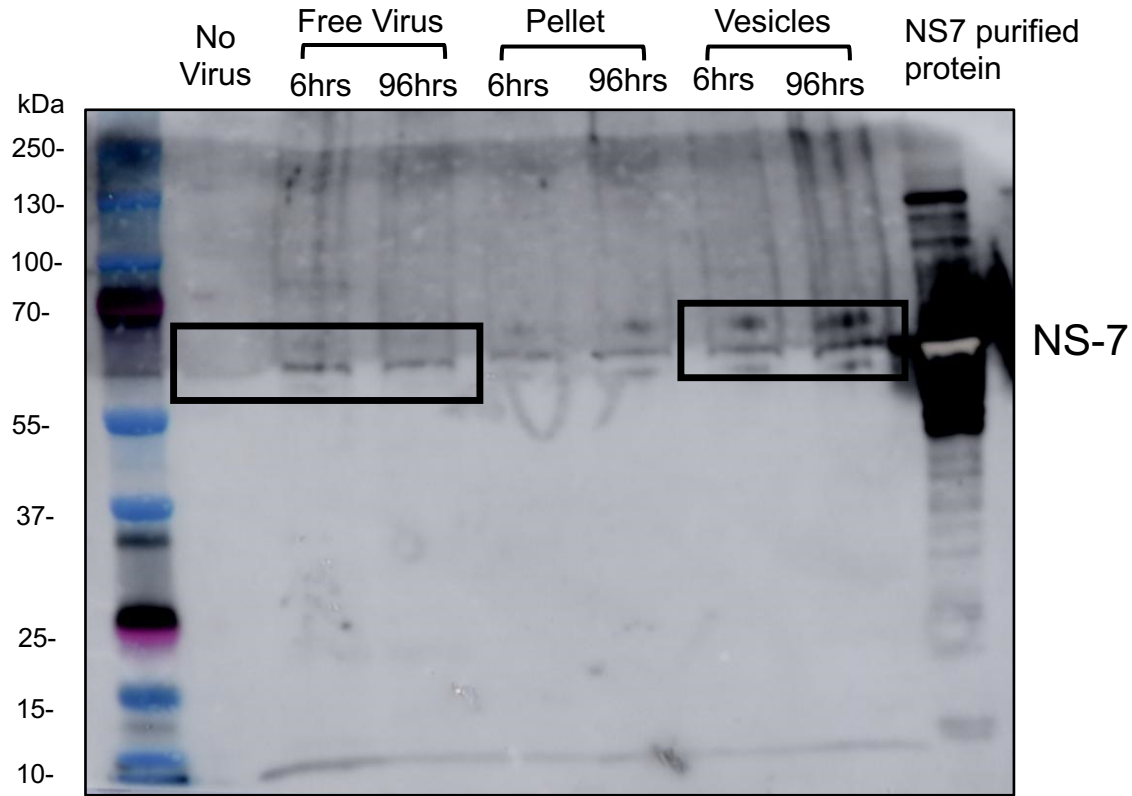

Extended Data Fig. 4g

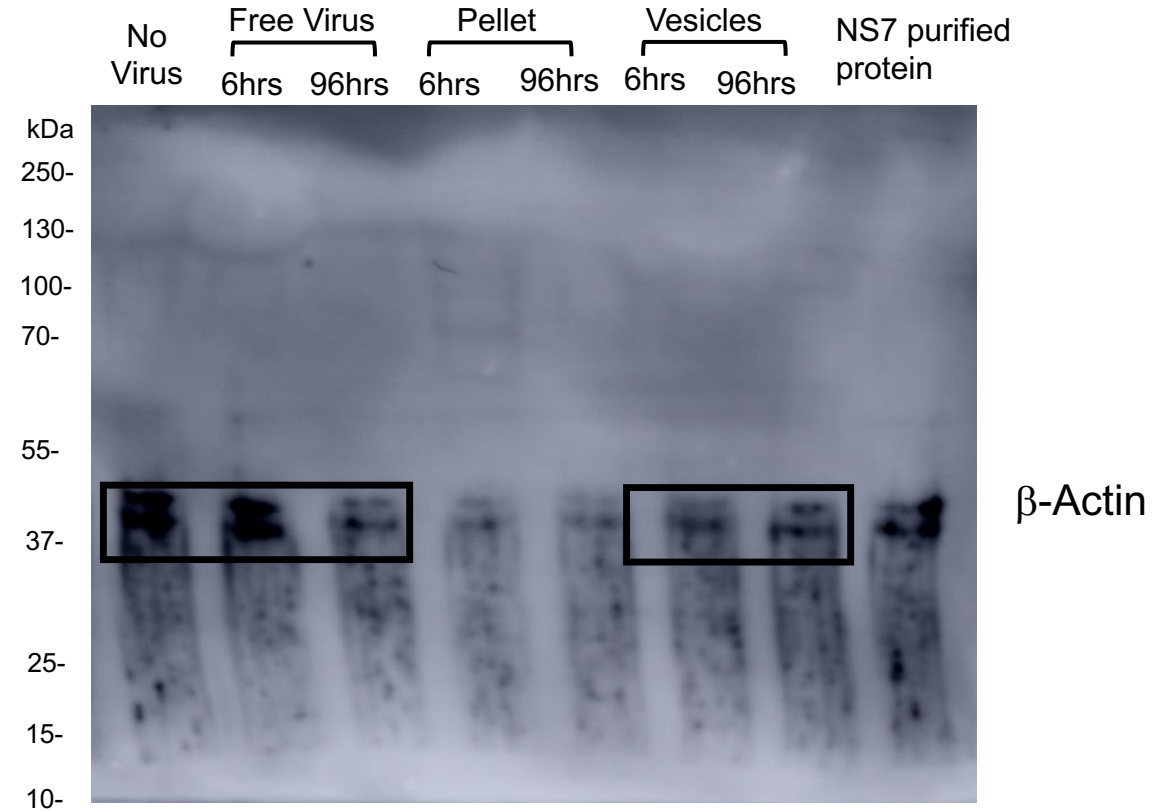

Extended Data Fig. 4g

\*pellet= stool filtrate debris obtained after multiple rounds of spin-downs as mentioned in Methods. The supernatant from there was used for vesicle isolation.

 Cropped frame used in figure

# Immunoblots for NS-SV-TT-DC/AC HuNoV replication

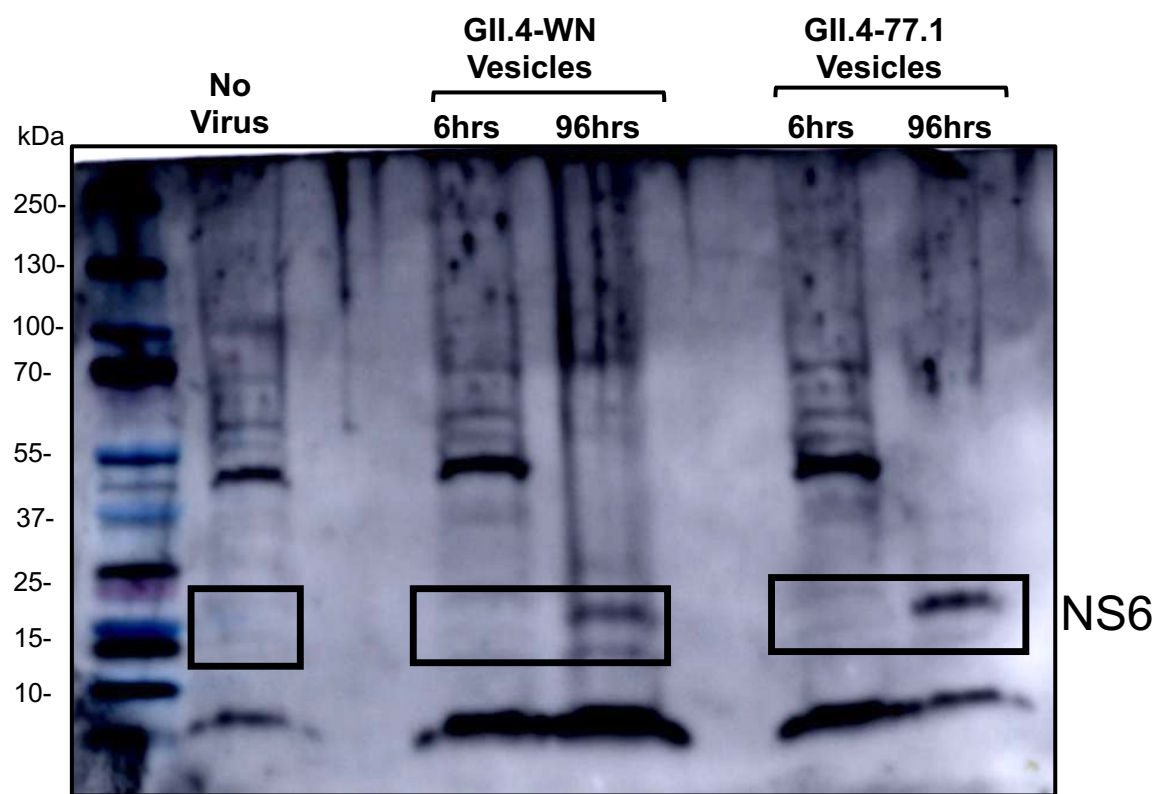

Extended Data Fig. 4f

 Cropped frame used in figure

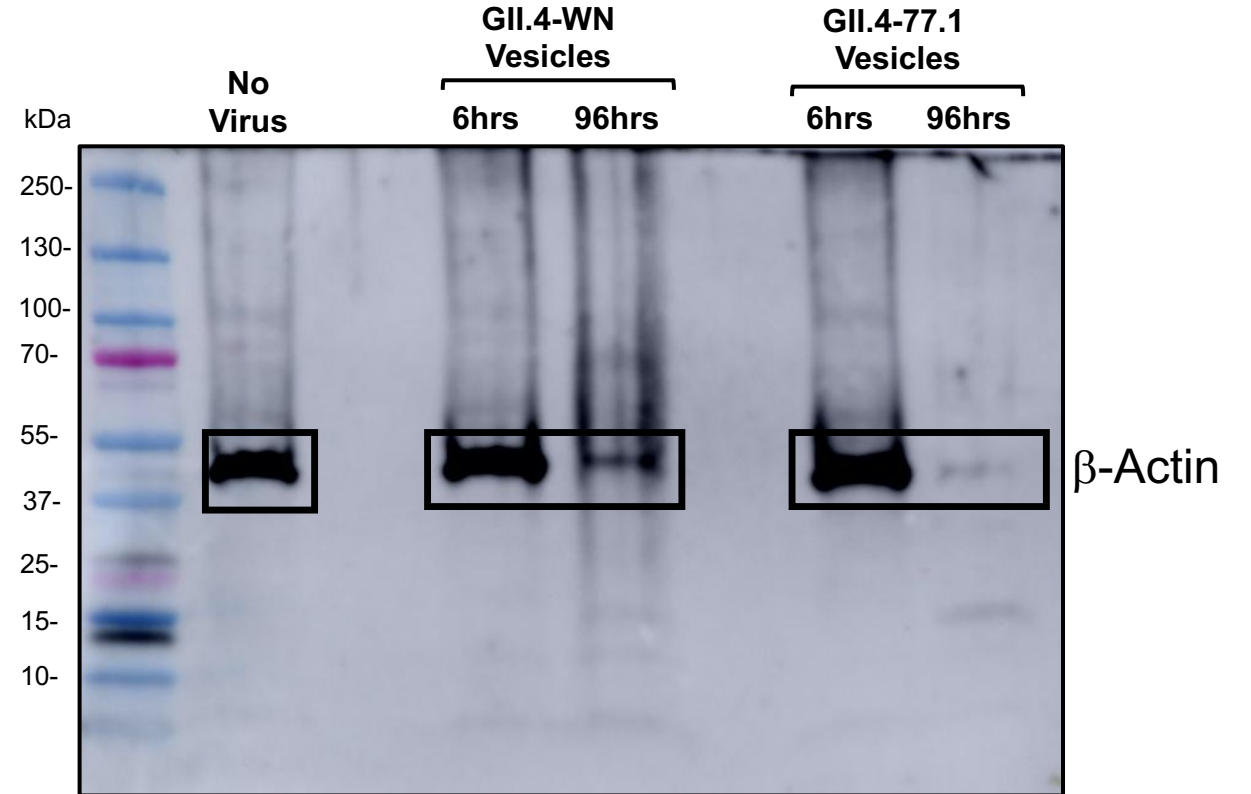

Supplement: 41586_2022_4895_MOESM1_ESM.pdf [file 41586_2022_4895_MOESM1_ESM.pdf]
